# Supplementary material for: Integrating Option Grid Patient Decision Aids in the Epic Electronic Health Record: Case Study at 5 Health Systems
Source: J Med Internet Res. 2021 May 3;23(5):e22766. doi: 10.2196/22766 (PMC8129884; doi:10.2196/22766)
Supplement: Multimedia Appendix 2 [file jmir_v23i5e22766_app2.docx]

Multimedia Appendix 2. Code hierarchy used to identify the facilitators and barriers of the EHR integration effort.

|  | **Themes** | **Code Categories** | **Sub-codes** |
| --- | --- | --- | --- |
| Facilitators | Utilization of SMART on FHIR standards | Hyperspace | IE requirements |
| Setup |
| Share links |
| External web browser |
| Other ways to access OG | Smartshell |
| Xealth |
| Standard Epic functionality |
| Best practice advisories (BPAs) |
| Active guidelines |
| CDS Hooks |
| Infobutton |
| SAML |
| HTTP Get encrypted |
| OBGYN navigator |
| FHIR/Smart launch | Track usage |
| Recommended by Epic |
| Tokens |
| Integration standardization |
| Smartphrase |
| Single sign-on |
| Click fatigue |
| No data request thru FIHR |
| OAuth 2.0 |
| No exchange of PHI between Option Grid and the institution’s local Epic environment. | PHI | Link back to particular patient |
| Exchange between OG and EHR |
| Switch data back into the record |
| Share PHI with OG |
| API |
| Private listing in App Orchard |
| HIPAA-compliant | De-identified data |
| Retrieval of patient data |
| Approval from various groups | IRB |
| Medical Records group |
| Presence of a clinical champion at each institution. | Prioritization | Present topic to institution |
| Initiate request |
| Resource dedication |
| Approval of next steps |
| Provide study context |
| Funding |
| Completion of security forms |
| Button launch point | Patient chart |
| Top toolbar |
| Within patient chart |
| Left activity bar |
| HealthPlan tab |
| Pages app tab |
| MORE activities |
| AVS |
| SDM tab |
| Up to date |
| Dotphrase |
| *Who* gets access? | Entire OBGYN practice |
| Specific clinicians |
| Entire institution |
| Encounter types |
| Presence of a Epic technologist with experience in building applications in Epic. | Guide | Integration steps |
| Demonstration of how OG works |
| Liaison to App Orchard TS |
| Build Guide |
| Troubleshooting |
| FDI record reviewer |
| Barriers | Lack of agency to control the Option Grid decision aid product owned by EBSCO. | UF OG | Access to entire suite |
| Access to only UF tool |
| Number of options available |
| Type of build | SMART on FHIR |
| HealthDecision | Merger |
| Periodic Epic upgrades causing some delays and functionality issues. | Timing | - |
| EHR version | - |
| Code freezes | Code changes |
| Glitches found when troubleshooting the application leading to minor delays to launch. | PDF button | Printing |
| Trouble finding UF tool | - |
| Client ID | - |
| Error message | - |
| Workspace FDI build | RiscPacs.Redirector/ ActiveGuidlines |
